1 **Triazolopyrimidines target aerobic respiration in *Mycobacterium tuberculosis***

2

3

4 Catherine Shelton<sup>1</sup>, Matthew McNeil<sup>1</sup>, Lindsay Flint<sup>1</sup>, Dara Russell<sup>1</sup>, Bryan Berube<sup>1,2</sup>, Aaron Korkegian<sup>1</sup>,  
5 Yulia Ovechkina<sup>1,2</sup>, and Tanya Parish<sup>1,2\*</sup>

6

7

8 **Affiliations**

9 <sup>1</sup>TB Discovery Research, Infectious Disease Research Institute, Seattle, Washington, United States of  
10 America.

11 <sup>2</sup>Center for Global Infectious Disease Research, Seattle Children's Research Institute, Seattle,  
12 Washington, United States of America.

13

14 \*Corresponding author [tanya.parish@seattlechildrens.org](mailto:tanya.parish@seattlechildrens.org)

15

16 **Keywords**

17 aerobic respiration, antibiotic resistance, antibiotic tolerance, tuberculosis

18

## 19 Abstract

20 We previously identified a series of triazolopyrimidines with anti-tubercular activity. We determined that  
21 *Mycobacterium tuberculosis* strains with mutations in a component of the cytochrome *bc<sub>1</sub>* system (QcrB)  
22 were resistant to the series. A cytochrome *bd* oxidase deletion strain was also more sensitive to this series.  
23 We isolated resistant mutants, all of which had mutations in Rv1339. Compounds were active against  
24 intracellular bacteria but did not inhibit mitochondrial respiration in human HepG2 cells. These data are  
25 consistent with triazolopyrimidines acting via inhibition of *M. tuberculosis* QcrB.

26  
27  
28  
29 We previously identified a series of triazolopyrimidines with anti-tubercular activity (1); compounds were  
30 bacteriostatic for replicating *Mycobacterium tuberculosis*, but bactericidal for non-replicating bacteria.  
31 We explored the structure-activity relationship and determined druglike properties. We wanted to  
32 determine the target and/or mechanism of action of the TZP series. Since previous work in our group and  
33 others had identified several common targets, we tested a set of analogs for activity against strains  
34 carrying mutations in promiscuous targets (Figure 1) (2).

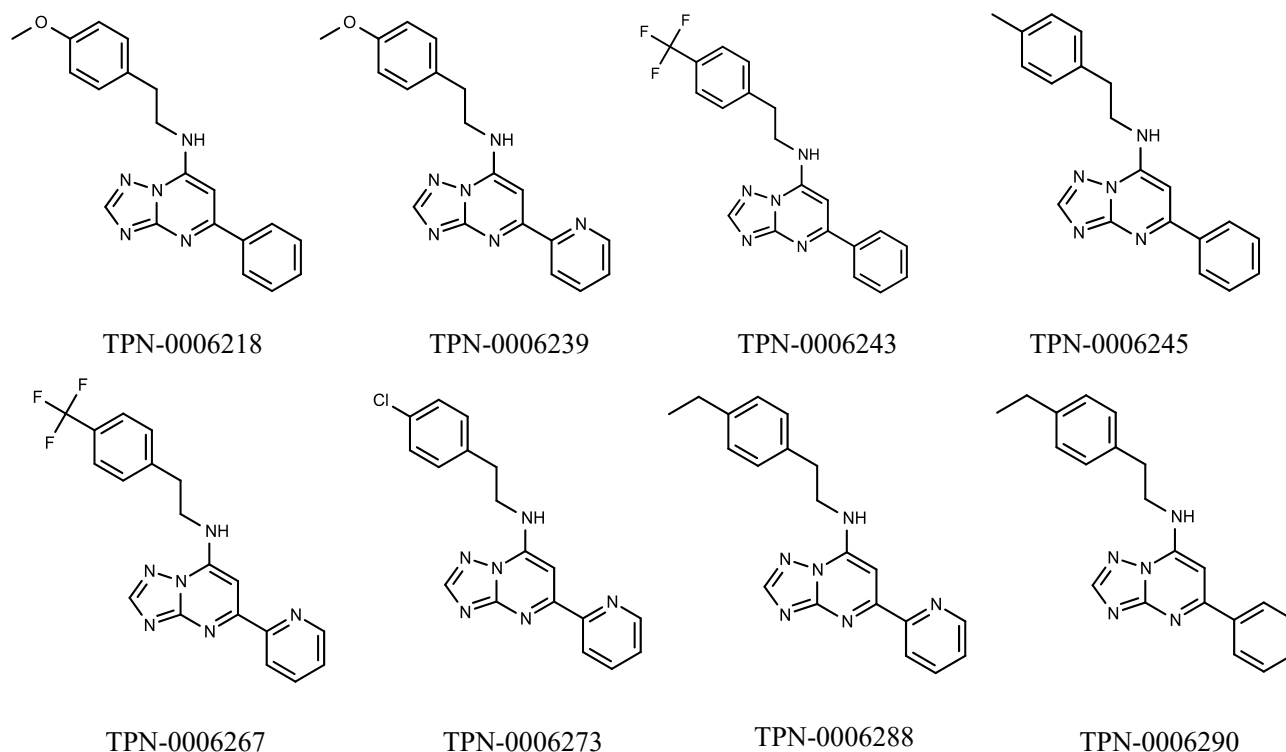

**Figure 1. Structures of molecules.**

35

36

37  
 38 We selected DprE1, MmpL3 and QcrB as the most common targets (3–6). We determined activity against  
 39 strains carrying either DprE1<sub>C387S</sub>, MmpL3<sub>F255L</sub> or QcrB<sub>A396T</sub> mutations in the parental strain *M.*  
 40 *tuberculosis* H37Rv-LP (ATCC 25618) (Table 1) (7). MICs were determined as described after 5 days  
 41 growth in Middlebrook 7H9 medium plus 10% v/v OADC supplement and 0.05% w/v Tween 80 (8). We  
 42 saw a small shift in MICs in the QcrB<sub>A396T</sub> mutant strain of ~2 to 4-fold increase in resistance. No  
 43 significant changes were seen in the DprE1<sub>C387S</sub> or MmpL3<sub>F255L</sub> mutant strains.  
 44

| Molecule    | MIC (μM)       |             |             |            |
|-------------|----------------|-------------|-------------|------------|
|             | Wild-type (n)  | DprE1 C387S | MmpL3 F255L | QcrB A396T |
| TPN-0006218 | 2.6 ± 1.3 (9)  | 0.94 ± 0.67 | 2 ± 0.99    | 6.8 ± 2.8  |
| TPN-0006239 | 1.1 ± 0.5 (10) | 0.42 ± 0.07 | 0.86 ± 0.21 | 3.4 ± 0.28 |
| TPN-0006243 | 3.7 ± 2.9 (14) | 0.95 ± 0.29 | 2.7 ± 2.4   | 5.7 ± 2.1  |
| TPN-0006245 | 2 ± 1.1 (11)   | 0.92 ± 0.3  | 2 ± 0.07    | 5.6 ± 2.5  |
| TPN-0006267 | 1.4 ± 1.4 (8)  | 0.66 ± 0.01 | 1.8 ± 0.57  | 5.9 ± 3.5  |

45  
 46 **Table 1. Activity against strains of *M. tuberculosis*.** MICs were determined after 5 days in duplicate (except  
 47 for wild-type where n = number of replicates). The genotype of the strain is noted. Wild-type is *M.*  
 48 *tuberculosis* H37Rv-LP (ATCC 25618).  
 49

50 In order to confirm that QcrB mutation did lead to resistance and is the likely target, we tested compounds  
 51 against two additional strains carrying QcrB mutations (T313I and M342T) (5,9), QcrB<sub>T313I</sub> is the most  
 52 commonly mutation which confers resistance to inhibitors (Table 2). We confirmed high level resistance  
 53 in both strains.  
 54

| Molecule    | H37Rv ATCC 26518 MIC (μM) |                       | H37Rv ATCC 27294 MIC (μM) |              |
|-------------|---------------------------|-----------------------|---------------------------|--------------|
|             | QcrB <sub>T313I</sub>     | QcrB <sub>M342T</sub> | Wild-type                 | <i>cydKO</i> |
| TPN-0006239 | >20                       | >20                   | 5.9 ± 0.6                 | 0.38 ± 0.04  |
| TPN-0006243 | >20                       | 11                    | 9.5 ± 3.5                 | 0.13 ± 0.007 |
| TPN-0006245 | >20                       | >20                   | 2.2 ± 0.9                 | <0.39        |
| TPN-0006245 | >20                       | >20                   | nd                        | nd           |
| TPN-0006267 | >20                       | 10                    | nd                        | nd           |

55  
 56 **Table 2. Activity against strains of *M. tuberculosis*.** MICs were determined after 5 days. The genotype of the  
 57 strain and parental strain is noted. nd – not determined.  
 58

59 QcrB is a component of the cytochrome *bc<sub>1</sub>* complex in the electron transport chain; *M. tuberculosis*  
 60 strains in which the alternative cytochrome oxidase (cytochrome *bd*) is deleted are hypersusceptible to  
 61 QcrB inhibitors (10,11). We also tested three compounds against *M. tuberculosis* H37Rv ATCC 272942  
 62 and the isogenic *CydC* deletion strain (11). As expected, *M. tuberculosis* H37Rv ATCC 27294 was more  
 63 resistant to the compounds than H37Rv ATCC 25618, as has been noted with other QcrB inhibitors,  
 64 although the mechanism behind this is unknown (10–12). Deletion of cytochrome *bd* activity resulted in  
 65 higher sensitivity to the three compounds (Table 2). Taken together these data strongly support the  
 66 hypothesis that the target of the series is QcrB.

67  
 68 We wanted to determine if there were additional targets or mechanism(s) of resistance, so we isolated and  
 69 characterized resistant mutants to the series. We selected compounds from our original set with the lowest  
 70 liquid MIC and determined MIC against *M. tuberculosis* H37Rv ATCC 25618 on solid medium (Table  
 71 3). We selected two compounds and plated  $\sim 10^8$  bacteria onto 5X and 10X solid MIC as described (4).  
 72 We isolated colonies and confirmed resistant mutants by measuring the MIC on solid medium; we  
 73 obtained nine resistant isolates for TPN-0006239 and five resistant isolates for TPN-0006267 (Table 3).

74

| Strain          | Compound    | MIC<br>( $\mu$ M) | Rv1339 | QcrB |
|-----------------|-------------|-------------------|--------|------|
| H37Rv-LP        | TPN-0006239 | 1.6               | wt     | wt   |
| LP-0497553-RM1  | TPN-0006239 | 25                | P121L  | wt   |
| LP-0497553-RM2  | TPN-0006239 | 25                | P121L  | wt   |
| LP-0497553-RM4  | TPN-0006239 | 50                | P121L  | wt   |
| LP-0497553-RM5  | TPN-0006239 | 50                | P121L  | wt   |
| LP-0497553-RM10 | TPN-0006239 | 50                | S120P  | wt   |
| LP-0497553-RM11 | TPN-0006239 | 50                | P121L  | wt   |
| LP-0497553-RM14 | TPN-0006239 | 50                | wt     | wt   |
| LP-0497553-RM15 | TPN-0006239 | 50                | P121L  | wt   |
| LP-0497553-RM23 | TPN-0006239 | 50                | wt     | wt   |
| H37Rv-LP        | TPN-0006267 | 1.6               | wt     | wt   |
| LP-0499227-RM1  | TPN-0006267 | > 100             | P121L  | wt   |
| LP-0499227-RM2  | TPN-0006267 | > 100             | P121L  | wt   |
| LP-0499227-RM3  | TPN-0006267 | > 100             | P121L  | wt   |
| LP-0499227-RM4  | TPN-0006267 | 25                | P121L  | wt   |
| LP-0499227-RM7  | TPN-0006267 | > 100             | P121L  | wt   |

75

76 **Table 3. Characterization of resistant isolates of *M. tuberculosis*.** MICs were determined in 24-well agar plates  
 77 after 3 weeks of incubation. Two genes (*qcrB* and *rv1339*) were sequenced in all strains.

78  
79 We sequenced the entire QcrB gene in all fourteen, but none of them had mutations (Table 3). We had  
80 previously seen mutations in Rv1339 leading to resistance to other QcrB inhibitors (5,9), so we sequenced  
81 Rv1339. We found the same mutation in eleven strains (P121L); one strain had the mutation S120P  
82 (Table 3). Two strains had no mutations in Rv1339. We have previously linked Rv1339 mutations to  
83 resistance to other QcrB inhibitor series, namely the imidazopyridines and the phenoxyalkylimidazoles  
84 (5,9). Recent work in the related organism *Mycobacterium smegmatis* suggests that Rv1339 is an atypical  
85 class II cAMP phosphodiesterase that has been linked to antibiotic tolerance (13). In addition a P94L  
86 mutation in Rv1399 led to increased persistence in animal models and increased resistance to external  
87 stress in *Mycobacterium canetti*, proposed to be due to changes in cell wall permeability (14). It is  
88 possible that the mutations we obtained lead to decreased compound permeation leading to resistance.  
89 However, it is unusual that resistance is largely seen with QcrB inhibitors, not as a general phenomenon;  
90 an alternative explanation for resistance could be changes in the intracellular ATP pool due to decreased  
91 turnover of cAMP.

92  
93 We had previously demonstrated that this series had bacteriostatic activity against replicating *M.*  
94 *tuberculosis*, but bactericidal activity against non-replicating bacteria (1). We have noted this biological  
95 activity profile for other QcrB inhibitors and thus it is consistent with it being an inhibitor of aerobic  
96 respiration (5,9,12). Since other QcrB inhibitors are active against intracellular bacteria, we tested the  
97 TZP series for activity against *M. tuberculosis* in human THP-1 macrophages. Macrophages were  
98 infected with *M. tuberculosis* expressing luciferase (15) at a multiplicity of infection of ~1 for 24h,  
99 washed to remove extracellular bacteria, and then exposed to compound for 72 h. Bacterial growth was  
100 measured by fluorescence. We tested five representative molecules, and all had potent activity with  $IC_{50} <$   
101  $1 \mu\text{M}$  (Table 4).

102

| <b>Molecule</b> | <b>Intracellular<br/><math>IC_{50}</math></b> |
|-----------------|-----------------------------------------------|
| TPN-0006218     | $0.23 \pm 0.08$                               |
| TPN-0006267     | $0.21 \pm 0.11$                               |
| TPN-0006273     | $0.19 \pm 0.13$                               |
| TPN-0006288     | $0.076 \pm 0.032$                             |
| TPN-0006290     | $0.18 \pm 0.09$                               |

103  
104 **Table 4. Activity against intracellular *M. tuberculosis*.**  $IC_{50}$  were measured after 72h in THP-1 cells infected at an  
105 MOI of 1 (n=2).

106

107 Since we identified the target of the TZP series as aerobic respiration, we determined whether the series  
108 might also inhibit mitochondrial respiration. We determined cytotoxicity against HepG2 cells cultured in  
109 DMEM with galactose as the carbon source to force the cells into using mitochondrial respiration (16).  
110 HepG2 cells were exposed to compound for 72 h and viability measured using CellTiterGlo (Promega)  
111 (1). Of eight compounds, six showed some cytotoxicity (Table 5), although they still had a good  
112 selectivity index (activity was more potent against *M. tuberculosis*). We compared the IC<sub>50</sub>s under this  
113 condition to those generated when HepG2 cells were cultured in glucose when mitochondrial respiration  
114 is not active (1). There was less than two-fold difference in the cytotoxicity, confirming that molecules  
115 are not inhibiting eukaryotic respiration.

| Molecule    | IC <sub>50</sub> (μM) |           |
|-------------|-----------------------|-----------|
|             | Glucose               | Galactose |
| TPN-0006218 | >100                  | 65        |
| TPN-0006239 | >100                  | 73        |
| TPN-0006243 | >100                  | >100      |
| TPN-0006245 | 58                    | 39        |
| TPN-0006267 | >100                  | >100      |
| TPN-0006273 | 100                   | 76        |
| TPN-0006288 | 44                    | 23        |
| TPN-0006290 | 49                    | 33        |

116  
117 **Table 5. Cytotoxicity against human HepG2 cells.** HepG2 cells were cultured in medium containing either  
118 galactose or glucose as the carbon source. IC<sub>50</sub> = the concentration required to reduce cell number by 50% was  
119 determined after 3 days exposure to compounds.

120  
121 In conclusion, we have determined that the triazolopyrimidine series inhibits *M. tuberculosis* growth by  
122 targeting QcrB, a component of the electron transport chain. In addition, we have demonstrated that  
123 mutations in either the target QcrB, or the putative phosphodiesterase Rv1339 lead to resistance. Since  
124 QcrB is a clinically validated target, this is an attractive series to develop further.

## 125 126 **Acknowledgements**

127 We thank Lena Anoshchenko, Junitta Guzman, David Roberts, Dean Thompson and James Vela for  
128 technical assistance.

## 129 130 **Funding**

131 This research was supported with funding from the Bill and Melinda Gates Foundation, under grant  
132 OPP1024038.

133

## 134 **References**

135 1. Zuniga ES, Korkegian A, Mullen S, Hembre EJ, Ornstein PL, Cortez G, et al. The synthesis and  
136 evaluation of triazolopyrimidines as anti-tubercular agents. *Bioorg Med Chem*. 2017 Aug  
137 1;25(15):3922–46.

138 2. Goldman RC. Why are membrane targets discovered by phenotypic screens and genome sequencing  
139 in *Mycobacterium tuberculosis*? *Tuberc Edinb Scotl*. 2013 Nov;93(6):569–88.

140 3. McNeil MB, O'Malley T, Dennison D, Shelton CD, Sunde B, Parish T. Multiple Mutations in  
141 *Mycobacterium tuberculosis* MmpL3 Increase Resistance to MmpL3 Inhibitors. *mSphere*. 2020 Oct  
142 14;5(5):e00985-20.

143 4. Ioerger TR, O'Malley T, Liao R, Guinn KM, Hickey MJ, Mohaideen N, et al. Identification of new  
144 drug targets and resistance mechanisms in *Mycobacterium tuberculosis*. *PLoS One*.  
145 2013;8(9):e75245.

146 5. Chandrasekera NS, Berube BJ, Shetye G, Chettiar S, O'Malley T, Manning A, et al. Improved  
147 Phenoxyalkylbenzimidazoles with Activity against *Mycobacterium tuberculosis* Appear to Target  
148 QcrB. *ACS Infect Dis*. 2017 Dec 8;3(12):898–916.

149 6. Cleghorn LAT, Ray PC, Odingo J, Kumar A, Wescott H, Korkegian A, et al. Identification of  
150 Morpholino Thiophenes as Novel *Mycobacterium tuberculosis* Inhibitors, Targeting QcrB. *J Med*  
151 *Chem*. 2018 Aug 9;61(15):6592–608.

152 7. Ioerger TR, Feng Y, Ganesula K, Chen X, Dobos KM, Fortune S, et al. Variation among genome  
153 sequences of H37Rv strains of *Mycobacterium tuberculosis* from multiple laboratories. *J Bacteriol*.  
154 2010 Jul;192(14):3645–53.

155 8. Ollinger J, Bailey MA, Moraski GC, Casey A, Florio S, Alling T, et al. A dual read-out assay to  
156 evaluate the potency of compounds active against *Mycobacterium tuberculosis*. *PLoS One*.  
157 2013;8(4):e60531.

158 9. O'Malley T, Alling T, Early JV, Wescott HA, Kumar A, Moraski GC, et al. Imidazopyridine  
159 Compounds Inhibit *Mycobacterial* Growth by Depleting ATP Levels. *Antimicrob Agents*  
160 *Chemother*. 2018 Jun;62(6):e02439-17.

161 10. Moosa A, Lamprecht DA, Arora K, Barry CE, Boshoff HIM, Ioerger TR, et al. Susceptibility of  
162 *Mycobacterium tuberculosis* Cytochrome bd Oxidase Mutants to Compounds Targeting the  
163 Terminal Respiratory Oxidase, Cytochrome c. *Antimicrob Agents Chemother*. 2017  
164 Oct;61(10):e01338-17.

165 11. Arora K, Ochoa-Montano B, Tsang PS, Blundell TL, Dawes SS, Mizrahi V, et al. Respiratory  
166 Flexibility in Response to Inhibition of Cytochrome c Oxidase in *Mycobacterium tuberculosis*.  
167 *Antimicrob Agents Chemother*. 2014 Nov;58(11):6962–5.

- 168 12. Berube BJ, Parish T. Combinations of Respiratory Chain Inhibitors Have Enhanced Bactericidal  
169 Activity against *Mycobacterium tuberculosis*. *Antimicrob Agents Chemother*. 2018  
170 Jan;62(1):e01677-17.
- 171 13. Thomson M, Nunta K, Cheyne A, Liu Y, Garza-Garcia A, Larrouy-Maumus G. Modulation of the  
172 cAMP levels with a conserved actinobacteria phosphodiesterase enzyme reduces antimicrobial  
173 tolerance in mycobacteria [Internet]. 2020 Aug [cited 2021 Sep 30] p. 2020.08.26.267864.  
174 Available from: <https://www.biorxiv.org/content/10.1101/2020.08.26.267864v1>
- 175 14. Allen AC, Malaga W, Gaudin C, Volle A, Moreau F, Hassan A, et al. Parallel in vivo experimental  
176 evolution reveals that increased stress resistance was key for the emergence of persistent  
177 tuberculosis bacilli. *Nat Microbiol*. 2021 Aug;6(8):1082–93.
- 178 15. Andreu N, Zelmer A, Fletcher T, Elkington PT, Ward TH, Ripoll J, et al. Optimisation of  
179 bioluminescent reporters for use with mycobacteria. *PloS One*. 2010 May 24;5(5):e10777.
- 180 16. Orlicka-Płocka M, Gurda-Wozna D, Fedoruk-Wyszomirska A, Wyszko E. Circumventing the  
181 Crabtree effect: forcing oxidative phosphorylation (OXPHOS) via galactose medium increases  
182 sensitivity of HepG2 cells to the purine derivative kinetin riboside. *Apoptosis Int J Program Cell  
183 Death*. 2020 Dec;25(11–12):835–52.
